# Supplementary material
Source: publisher figshare collection journal article supplement (https://karger.figshare.com/articles/dataset/_/5126545)
Supplement: Supplementary file 1 [file 1]

The Warfarin–Aspirin Symptomatic Intracranial Disease (WASID) Trial Investigators are listed below:

**Administrative Structure and Participants:** Operations Committee — M. Chimowitz, M. Lynn, H. Howlett-Smith, B. Stern, V. Hertzberg, G. Cotsonis (Emory University). Clinical Coordinating Center — M. Chimowitz, H. Howlett-Smith, A. Calcaterra, N. Yarab, B. Stern (Department of Neurology, Emory University). Statistical Coordinating Center — M. Lynn, V. Hertzberg, G. Cotsonis, S. Swanson, T. Tutu-Gxashe, N. Freret, L. Lu, A. Kosinski, P. Griffin (Department of Biostatistics, Rollins School of Public Health, Emory University). Pharmacy Coordinating Center — C. Chester, W. Asbury, S. Rogers (Pharmacy Department, Emory University Hospital). Steering Committee — M. Chimowitz, M. Lynn, H. Howlett-Smith, B. Stern, V. Hertzberg, M. Frankel, S. Levine, S. Chaturvedi, S. Kasner, C. Benesch, C. Sila, T. Jovin, J. Romano. Scientific Advisory Committee — H. Barnett, D. Easton, A. Fox, A. Furlan, P. Gorelick, R. Hart, H. Meldrum, D. Sherman. Central Neuroradiologists — H. Cloft, P. Hudgins, F. Tong. Neurology Adjudication Committee — L. Caplan, D. Anderson, V. Miller. Cardiology End Point Committee — L. Sperling, W. Weintraub, J. Marshall, S. Manoukian. Statistical Consultant — B. Tilley. Anticoagulation Consultant — J. Ansell. Internal Safety Monitor — K. Smith. Internal Clinical Event Monitor — J. Khan. National Institutes of Health/National Institute of Neurological Disorders and Stroke Liaison — B. Radziszewska, J. Marler. Performance and Safety Monitoring Committee — W. Powers, J. Thompson, R. Simon, L. Brass, K. Furie, M. Walker. **Clinical Sites** (listed in descending order of enrollment): Emory University — M. Chimowitz, B. Stern, M. Frankel, O. Samuels, H. Howlett-Smith, N. Yarab, J. Braimah, S. Sailor-Smith, B. Asbury, C. Chester. Wayne State University — S. Chaturvedi, S. Levine, R. Van Stavern, D. Wiseman, J. Andersen, A. Sampson-Haggood. University of Pennsylvania — S. Kasner, J. Luciano, D. Liebeskind, B. Cucchiara, J. Chalela, M. McGarvey, K. Douglas, K. Rockwell, Jr., S. Messe, J. Clarke. University of Rochester — C. Benesch, S. Burgin, J. Zentner, S. Bean, D. Cole. Cleveland Clinic Foundation — C. Sila, N. Rudd, L. Bragg, M. Horvat, D. Krieger, I. Katzan, A. Furlan, A. Abou-Chebl, D. Davis, J. Rose, J. Petrich, G. Mazzoli, L. Strozniak. University of Pittsburgh — L. Wechsler, J. Gebel, S. Goldstein, T. Jovin, S. DeCesare, B. Harbison, R. Bernstein. University of Miami — J. Romano, A. Forteza, N. Campo, M. Concha, S. Koch, A. Ferreira. University of California, San Diego/San Diego VA Medical Center — P. Lyden, C. Jackson, B. Meyer, T. Hemmen, L. Al-Khoury, Y. Cheng, S. Olson, N. Kelly, J. Werner, T. McClean, J. Gonzales, C. Adams, L. Rodriguez. MetroHealth Medical Center — J. Hanna, M. Winkelman, A. Liskay, M. Schella, N. Lewayne, L. Gullion, N. Thakore. University of California, San Francisco/San Francisco General Hospital — C. Hemphill, W. Smith, M. Farrant, L. Hewlett, S. Fields. Vancouver General Hospital — A. Woolfenden, P. Teal, C. Johnston, D. Synnot, J. Busser. Johns Hopkins Medical Center — R. Wityk, E. Aldrich, R. Llinas, K. Lane, S. Rice, J. Alt, L. White, T. Traill. St. Louis University — S. Cruz-Flores, J. Selhorst, E. Leira, E. Holzemer, J. Armbruster, H. Walden, T. Olsen. Stanford Stroke Center, Stanford University School of Medicine — D. Tong, M. Garcia, S. Kemp, H. Shen, M. Hamilton. Buffalo General Hospital — R. Chan, P. Pullicino, S. Harrington, K. Wrest, L. Hopkins, K. Crone, S. Seyse, A. Rubino. University of South Alabama — R. Zweifler, J. Mendizabal, M. Parnell, D. Alday, R. Yunker, E. Umana, T. Neal, J. Adkins, M.A. Mahmood, A. Malapira. Indiana University — A. Bruno, A. Sears, T. Pettigrew, J.D. Fleck, A.M. Lopez-Yunez, W.J. Jones. University of Texas Southwestern Medical Center at Dallas — H. Unwin, M. Johnson, D. Graybeal, M. Tinney, A. Redhead, J. Stanford, C. Croft, R. Lee. Neurological Institute of Savannah — E. LaFranchise, W. Widener, S. Reel, R. Maddox, D. Rice. University of Florida — S. Silliman, W. Ray, K. Ballew, D. Darracott, K. Robinson, K. Malcolm. Upstate Medical University — A. Culebras, M. Vertino, M. Dean, J. Ayers. Henry Ford Hospital — P. Mitsias, N. Papamitsakis, B. Silver, J. Reuther, P. Marchese, J. Hargrow, S. Kaatz, J. McCord. University of Virginia — K. Johnston, E. Haley, B. Nathan, M. Davis, K. Maupin, C. Grandinetti, A. Adams. Melbourne Internal Medicine Associates — B. Dandapani, W. Sunter, D. Mogle, N. Scallon-Andrews, R. Vicari. Long Island Jewish Medical Center — R. Libman, R. Benson, R. Bhatnagar, R. Gonzaga-Camfield, Y. Grant, T. Kwiatkowski, K. Alagappan. University of California, Los Angeles — J. Saver, C. Kidwell, D. Liebeskind, B. Ovbiagele, M. Tremwel, M. Leary, A. Rahiman, K. Ferguson, J. Llanes, F. Melamed. New England Medical Center — D. Thaler, T. Scandura, L. Douglass, M. Libenson. Maine Medical Center — J. Belden, D. Diconzo-Fanning, A. Carr, W. Allan. Mount Sinai Medical Center — S. Tuhrim, P. Wright, S. Augustine, J. Ali, J. Halperin, E. Rothlauf. Louisiana State University — R. Kelley, S. Jaffe, P. Jinkins, A. Pajeau, Y. Wang, S. Larson, A. Booth, M. Middlebrook. Cedars-Sinai Medical Center/VA West Los Angeles Healthcare Center — S.N. Cohen, T. Krauss, T. Jolly, L. Date, G. Abedi, M. Valmonte, L. Lee, A. Song, M. Wells. University of Texas — J. Grotta, M. Campbell, S. Shaw, R. Boudreaux, J. Hickey. Medical College of Georgia — F. Nichols, M. Sahm, A. Kutlar. Boston University — C. Kase, V. Babikian, N. Allen, H. Lau, J. Ansell, M. McDonough, M. Brophy, G. Barest. Evanston Hospital — R. Munson, D. Homer, T. McGinn, B. Small, A. Feinberg, B. Shim. Ohio State University — A. Slivka, Y. Mohammad, P. Notestine, L. Marcy. University of Arizona — R. Anderson, E. Labadie, D. Bruck, D. Rensvold, J. Devine, S. Kistler. Field Neuroscience Institute — F. Abbott, K. Gaines, K. Leedom, S. Beyer. Rochester General Hospital — J. Hollander, G. Honch, C. Weber, A. Sass, B. Porter, J. Lynch. St. Luke's–Roosevelt Hospital Center — J. Nasrallah, S. Azhar, E. Latwis-Viellette, A. Cameron. Oregon Stroke Center, Oregon Health and Science University — H. Lutsep, W. Clark, A. Vaishnav, M. Gaul, A. Doherty, S. Pasco, J. Brown. Rush–Presbyterian–St. Luke's Medical Center — M. Schneck, M. Sloan, K. Whited, D. Frame, G. Ruderman. Marshfield Clinic — P. Karanjia, E. St. Louis, L. Stephani, K. Mancl, K. Madden, C. Matti, M. Bachhuber, W. Thorne. Ochsner Clinic Foundation — R. Felberg, A. Cole, K. Fitzpatrick, K. Mckinley, S. Deitelzweig, C. Frisard. Beth Israel Deaconess Medical Center — C. Chaves, I. Linfante, C. Horkan, L. Barron, P. Ryan, D. Tarsey. University of Michigan — S. Hickenbottom, K. Maddox, A. Ahmed, H. Tamer. Scripps Clinic — M. Kalafut, J. Kampelman, M. Perlman, M. Lewis. University of Kentucky — C. Pettigrew, D. Taylor, H. Sabet, B. McIntosh. St. Thomas Medical Plaza West — C. Johnson, M. Kaminski, L. Hill, D. Pitts, A. Naftilan. Cleveland Clinic Florida — B. Dandapani, V. Salanga, R. Patino-Pauo, M. Piccarillo, M. Grove, R. Rosenthal. Harbin Clinic — M. Sloan, L. Shuler, S. Vaughan, B. Chacko. Medical College of Ohio — G. Tietjen, A. Korsnack, S. Scotton. Duke University — M. Alberts, L. Goldstein, G. Edwards, B. Thames. University of Mississippi — Y. Mohammad, C. Roach, T. Martin, J. King. Texas Tech University — D. Hurst, M. Tindall, K. Beasley, R. Sleeper. Williamson Medical Center — K. Gaines, C. Johnson, H. Kirshner, B. Sweeney, K. Haden, M. Abbatte, K. Gateley. Central Arkansas Veterans Health Care System — S. Nazarian, W. Metzer, E. Epperson, P. Sanders, B. Powell. University of California, Davis — P. Verro, N. Rudisill, A. Kelly-Messineo, J. Branch, L. Ramos. University of Maryland — M. Wozniak, S. Kittner, N. Zappala, S. Haines, A. Seitzman-Siegel.
